# Supplementary material
Source: PubMed Central journal article supplement (PMC2660958)

A

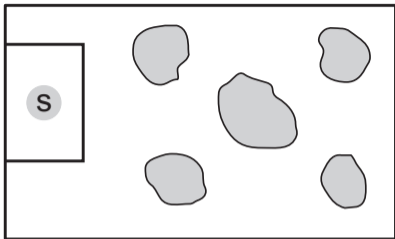

B

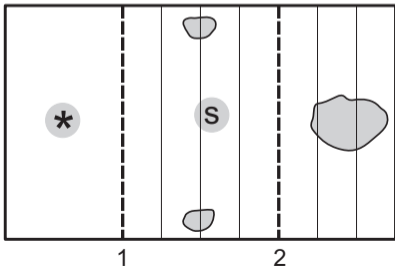

Supplement: rspb20081555s12.pdf [file rspb20081555s12.pdf]
